# Supplementary material for: Feasibility and Comparison of Resting Full-Cycle Ratio and Computed Tomography Fractional Flow Reserve in Patients with Severe Aortic Valve Stenosis
Source: MDPI journal article supplement (doi:10.3390/jcdd9040116), 2022-04-14
Supplement: s1 [file s1]

Supplementary

**Table S1. CT-Imaging and scan details per vessel.**

|                                                                                            |           |
|--------------------------------------------------------------------------------------------|-----------|
| Image Quality                                                                              |           |
| diagnostic despite impairment by image noise, artifacts, and/or low contrast opacification | 6 (13)    |
| moderate image noise with sufficient intraluminal visibility, artifacts may be present     | 20 (43.5) |
| good vessel contrast in the absence of major artifacts, low image noise                    | 16 (34.8) |
| excellent, no diagnostic limitations                                                       | 4 (8.7)   |
| Artifact Score                                                                             |           |
| excellent, no artifacts                                                                    | 2 (4.3)   |
| good                                                                                       | 27 (58.7) |
| limited                                                                                    | 17 (37.0) |
| Coronary Calcification                                                                     |           |
| mild                                                                                       | 7 (15.2)  |
| moderate                                                                                   | 24 (52.2) |
| severe                                                                                     | 15 (32.6) |

Values are n (%)
